# Supplementary material
Source: publisher figshare collection journal article supplement (https://tandf.figshare.com/ndownloader/files/13638749)
Supplement: Supplementary file 1 [file 13638749]

**SUPPLEMENTARY APPENDIX**

This appendix has been provided by the authors to give readers additional information about their work.

Supplement to:

***Agrobacterium rhizogenes*-****mediated transformation of *Arachis hypogaea*: an efficient** **tool for functional study of genes**

Shuai Liu, Liangchen Su, Shuai Liu, Xiaojun Zeng, Danmin Zheng, Lan Hong and Ling Li

Biotechnol. Biotechnol. Equip. 2016, **30**

**Supplementary Appendix**

**Table S1.** Primers used for gene expression analysis.

| Primer | Primer sequence (5 to 3) |
| --- | --- |
| GFP-F | 5'-GCCCGGGTAGTAAAGGAGAAGAACTTTTCACTGG-3' |
| GFP-R | 5'-GGAGCTCTTATTTGTATAGTTCATCCATGCCATGTG-3' |
| 18S-F | 5'-TACGTCCCTGCCCTTTGTAC-3' |
| 18S-R | 5'-CCTACGGAAACCTTGTTACGAC-3' |
| AREB1-RT-F | 5'-ATGAACTTCAGGGGCTATGGTGATA-3' |
| AREB1-RT-R | 5'-CTACCATGGACCTGTAACCGTCCTT-3' |
| ACTIN-F | 5'- GATTGGAATGGAAGCTGCTG-3' |
| ACTIN -R | 5'-CGGTCAGCAATACCAGGGAA-3' |
| AREB1- RealT -F | 5'-ACAAGGGCAACCAGCATTAGG-3' |
| AREB1- RealT -R | 5'-TCACCACCACCATACCAACCA-3' |
| WRKY33-F | 5'-TGGACTTTTCGGCTACAC-3' |
| WRKY33-R | 5'-CCTTCCTTTCATCCTTGG-3' |
| MYB92- F | 5'-CGGCAACAACGAGTCAGAAA-3' |
| MYB92- R | 5'-TCACACCAACCTCACCCAAA-3' |
| PYL5-F | 5'-AACTACCGCTCCGTTACA-3' |
| PYL5-R | 5'-ACGAACACGCAAGTCTCT-3' |
| DHN2-F | 5'-GTTACTTCCTTCCATTACGC-3' |
| DHN2-R | 5'-GCTTATTCTCACCCTCCTTT-3' |
